# Supplementary material
Source: PubMed Central journal article supplement (PMC4224120)
Supplement: NIHMS60876-supplement-Appendix.pdf [file NIHMS60876-supplement-Appendix.pdf]

### eAppendix 1: Location of the gene promoter and region amplified

| Gene                          | Chromosome | Promoter<br><i>Start</i><br><i>end</i> | Amplicon<br><i>Start</i><br><i>end</i> | Location          | Promoter | CpGs (position)                                                                                  |
|-------------------------------|------------|----------------------------------------|----------------------------------------|-------------------|----------|--------------------------------------------------------------------------------------------------|
| <i>F3</i>                     | 1          | 94779671<br>94780502                   | 94779878<br>94780068                   | CpG<br>island     | Yes      | 94779947 (pos1)<br>94779950 (pos2)<br>94779956 (pos3)<br>94779958 (pos4)<br>94779974 (pos5)      |
| <i>ICAM</i>                   | 19         | 10242017<br>10242937                   | 10242034<br>10242283                   | CpG<br>island     | Yes      | 10242236 (pos1)<br>10242225 (pos2)<br>10242218 (pos3)                                            |
| <i>TLR2</i>                   | 4          | 154824391<br>154824991                 | 154824566<br>154824754                 | CpG<br>island     | Yes      | 154824709 (pos1)<br>154824713 (pos2)<br>154824715 (pos3)<br>154824723 (pos4)<br>154824727 (pos5) |
| <i>CRAT</i>                   | 9          | 130912702<br>130913404                 | 130912776<br>130912862                 | CpG<br>island     | Yes      | 130912824 (pos1)<br>130912806 (pos2)                                                             |
| <i>OGG1</i>                   | 3          | 9766128<br>9766775                     | 9766288<br>9766514                     | CpG<br>island     | Yes      | 9766356 (pos1)<br>9766366 (pos2)<br>9766373 (pos3)<br>9766380 (pos4)                             |
| <i>IFN<math>\gamma</math></i> | 12         | 66839561<br>66840293                   | 66840120<br>66840260                   | non-CpG<br>island |          | 66840192 (pos1)<br>66840186 (pos2)                                                               |
| <i>IL6</i>                    | 7          | 22732791<br>22733685                   | 22733758<br>22733893                   | non-CpG<br>island | No       | 22733847 (pos1)<br>22733841 (pos2)                                                               |
| <i>iNOS</i>                   | 17         | 23149861<br>23150461                   | 23149873<br>23149990                   | non-CpG<br>island | Yes      | 23149929 (pos1)<br>23149936 (pos2)                                                               |
| <i>GCR</i>                    | 5          | 142760496<br>142761097                 | 142760531<br>142760806                 | non-CpG<br>island | Yes      | 142760565                                                                                        |

**eAppendix 2: Tweedie distribution**

**Example of a Tweedie distribution**

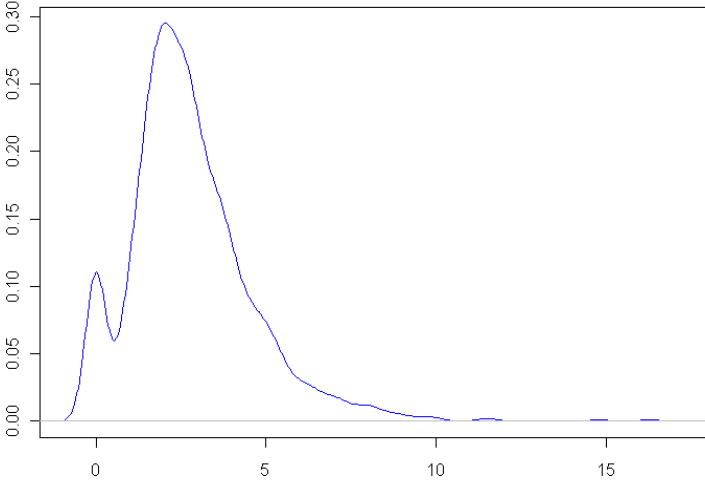

**eAppendix 3: Blood count characteristics of the NAS participants across visits**

|                                                                   | <b>Percent of neutrophils</b> | <b>Percent of lymphocytes</b> | <b>Percent of monocytes</b> | <b>Percent of basophils</b> |
|-------------------------------------------------------------------|-------------------------------|-------------------------------|-----------------------------|-----------------------------|
| <b>Baseline (n=777)</b>                                           | [48, 62, 74]                  | [15, 26, 38]                  | [6, 8, 12]                  | [0, 1, 1]                   |
| <b>N<sub>missing</sub></b>                                        | 22                            | 22                            | 29                          | 29                          |
| <b>Among participants having one visit (n<sub>1</sub>=221)</b>    |                               |                               |                             |                             |
| <b>Visit 1</b>                                                    | [48, 63, 77]                  | [13, 25, 37]                  | [5, 8, 12]                  | [0, 1, 1]                   |
| <b>Among participants having two visits (n<sub>1</sub>=217)</b>   |                               |                               |                             |                             |
| <b>Visit 1</b>                                                    | [47, 62, 74]                  | [15, 25, 40]                  | [6, 9, 13]                  | [0, 1, 1]                   |
| <b>Visit 2</b>                                                    | [48, 64, 75]                  | [14, 24, 37]                  | [6, 9, 13]                  | [0, 1, 1]                   |
| <b>Among participants having three visits (n<sub>3</sub>=216)</b> |                               |                               |                             |                             |
| <b>Visit 1</b>                                                    | [47, 62, 72]                  | [16, 26, 39]                  | [6, 9, 12]                  | [0, 1, 1]                   |
| <b>Visit 2</b>                                                    | [48, 62, 74]                  | [15, 26, 38]                  | [6, 9, 12]                  | [0, 1, 1]                   |
| <b>Visit 3</b>                                                    | [48, 62, 76]                  | [13, 25, 39]                  | [5, 8, 12]                  | [0, 1, 1]                   |
| <b>Among participants having four visits (n<sub>4</sub>=120)</b>  |                               |                               |                             |                             |
| <b>Visit 1</b>                                                    | [49, 61, 74]                  | [15, 26, 36]                  | [6, 8, 12]                  | [0, 1, 1]                   |
| <b>Visit 2</b>                                                    | [46, 62, 78]                  | [13, 25, 40]                  | [5, 9, 12]                  | [0, 1, 1]                   |
| <b>Visit 3</b>                                                    | [47, 61, 76]                  | [13, 26, 37]                  | [5, 9, 12]                  | [0, 1, 1]                   |
| <b>Visit 4</b>                                                    | [50, 63, 76]                  | [12, 25, 37]                  | [5, 8, 12]                  | [0, 1, 1]                   |
| <b>Among participants having five visits (n<sub>5</sub>=3)</b>    |                               |                               |                             |                             |
| <b>Visit 1</b>                                                    | [49, 58, 67]                  | [18, 25, 33]                  | [9, 10, 11]                 | [1, 1, 1]                   |
| <b>Visit 2</b>                                                    | [59, 64, 70]                  | [18, 22, 26]                  | [8, 9, 10]                  | [0, 0, 1]                   |
| <b>Visit 3</b>                                                    | [16, 54, 68]                  | [18, 29, 78]                  | [3, 9, 11]                  | [1, 1, 1]                   |
| <b>Visit 4</b>                                                    | [14, 60, 67]                  | [17, 18, 83]                  | [2, 10, 14]                 | [0, 0, 1]                   |
| <b>Visit 5</b>                                                    | [15, 55, 75]                  | [13, 24, 82]                  | [2, 9, 11]                  | [0, 1, 1]                   |

**eAppendix 4: Distributions of the weather and air pollution variables**

|                                            | <b>n<sub>observations</sub></b> | <b>n<sub>missing</sub></b> | <b>IQR</b> | <b>5<sup>th</sup></b> | <b>Percentiles<br/>50<sup>th</sup></b> | <b>95<sup>th</sup></b> |
|--------------------------------------------|---------------------------------|----------------------------|------------|-----------------------|----------------------------------------|------------------------|
| <b>Temperature (°C)</b>                    |                                 |                            |            |                       |                                        |                        |
| 1 week                                     | 1,798                           | 0                          | 13°C       | -1°C                  | 13°C                                   | 24°C                   |
| 2 weeks                                    | 1,798                           | 0                          | 13°C       | -1°C                  | 13°C                                   | 24°C                   |
| 3 weeks                                    | 1,798                           | 0                          | 13°C       | -1°C                  | 13°C                                   | 23°C                   |
| <b>Relative humidity (%)</b>               |                                 |                            |            |                       |                                        |                        |
| 1 week                                     | 1,798                           | 0                          | 12%        | 53%                   | 68%                                    | 82%                    |
| 2 weeks                                    | 1,798                           | 0                          | 10%        | 56%                   | 68%                                    | 80%                    |
| 3 weeks                                    | 1,798                           | 0                          | 9%         | 56%                   | 68%                                    | 78%                    |
| <b>PM<sub>2.5</sub> (µg/m<sup>3</sup>)</b> |                                 |                            |            |                       |                                        |                        |
| 1 week                                     | 1,798                           | 0                          | 4.3        | 5.8                   | 9.5                                    | 16.0                   |
| 2 weeks                                    | 1,798                           | 0                          | 3.8        | 6.2                   | 9.5                                    | 15.2                   |
| 3 weeks                                    | 1,798                           | 0                          | 3.5        | 6.3                   | 9.6                                    | 14.8                   |

**eAppendix 5:** Spearman correlations between weather variables and PM<sub>2.5</sub> (1-week moving average)

|                            | <b>Temperature</b> | <b>Relative humidity</b> | <b>Absolute humidity</b> | <b>Barometric pressure</b> | <b>PM<sub>2.5</sub></b> |
|----------------------------|--------------------|--------------------------|--------------------------|----------------------------|-------------------------|
| <b>Temperature</b>         | 1                  | 0.22*                    | 0.96*                    | -0.06*                     | 0.30*                   |
| <b>Relative humidity</b>   |                    | 1                        | 0.46*                    | 0.05*                      | 0.10*                   |
| <b>Absolute humidity</b>   |                    |                          | 1                        | -0.04                      | 0.30*                   |
| <b>Barometric pressure</b> |                    |                          |                          | 1                          | 0.08*                   |
| <b>PM<sub>2.5</sub></b>    |                    |                          |                          |                            | 1                       |

\*p-value<0.05

**eAppendix 6a: Gene specific DNA methylation (% 5mC) across visits [5<sup>th</sup>, 50<sup>th</sup>, and 95<sup>th</sup> percentiles]**

| <b>Gene</b>                                     | <b><i>F3</i></b> | <b><i>ICAM-1</i></b> | <b><i>TLR-2</i></b> | <b><i>CRAT</i></b> | <b><i>OGG</i></b> |
|-------------------------------------------------|------------------|----------------------|---------------------|--------------------|-------------------|
| <b>n<sub>observations</sub></b>                 | 1,533            | 1,424                | 1,424               | 1,669              | 1,159             |
| <b>n<sub>missing</sub></b>                      | 265              | 374                  | 374                 | 129                | 639               |
| <b>Baseline (n=777)</b>                         | [1.0, 2.0, 4.5]  | [2.2, 4.1, 8.2]      | [1.5, 2.8, 5.3]     | [1.7, 3.1, 5.0]    | [0.8, 1.8, 4.1]   |
| <b>Participants having one visit (n=221)</b>    |                  |                      |                     |                    |                   |
| <b>Visit 1</b>                                  | [1.1, 1.9, 3.5]  | [2.6, 4.3, 7.7]      | [1.4, 2.8, 5.0]     | [2.0, 3.2, 4.6]    | [0.8, 1.6, 4.1]   |
| <b>Participants having two visits (n=217)</b>   |                  |                      |                     |                    |                   |
| <b>Visit 1</b>                                  | [1.0, 2.0, 4.2]  | [2.2, 4.1, 8.4]      | [1.5, 2.6, 5.1]     | [1.7, 3.1, 5.1]    | [0.8, 1.8, 4.1]   |
| <b>Visit 2</b>                                  | [0.8, 2.3, 4.4]  | [2.2, 3.9, 8.2]      | [1.0, 2.6, 5.7]     | [1.6, 3.2, 5.2]    | [0.5, 1.7, 4.5]   |
| <b>Participants having three visits (n=216)</b> |                  |                      |                     |                    |                   |
| <b>Visit 1</b>                                  | [1.0, 2.0, 4.5]  | [2.1, 3.8, 7.6]      | [1.3, 2.8, 5.2]     | [1.6, 3.0, 5.1]    | [1.0, 2.0, 4.1]   |
| <b>Visit 2</b>                                  | [0.9, 2.5, 4.5]  | [2.1, 3.6, 7.8]      | [1.5, 2.6, 5.3]     | [1.5, 2.9, 5.6]    | [0.8, 2.0, 4.4]   |
| <b>Visit 3</b>                                  | [0.9, 1.8, 4.3]  | [2.9, 4.2, 6.7]      | [0.9, 2.1, 4.9]     | [1.9, 3.3, 5.2]    | [0.3, 1.3, 6.0]   |
| <b>Participants having four visits (n=120)</b>  |                  |                      |                     |                    |                   |
| <b>Visit 1</b>                                  | [0.4, 2.3, 5.2]  | [2.1, 4.0, 9.8]      | [1.9, 3.3, 5.9]     | [1.6, 3.0, 5.5]    | [0.9, 2.0, 5.3]   |
| <b>Visit 2</b>                                  | [1.0, 2.4, 4.8]  | [2.0, 3.3, 9.9]      | [1.7, 3.1, 6.0]     | [1.6, 2.9, 5.1]    | [0.6, 1.5, 4.3]   |
| <b>Visit 3</b>                                  | [1.8, 2.9, 4.5]  | [2.5, 4.4, 6.1]      | [1.5, 3.0, 6.3]     | [2.4, 3.5, 5.3]    | [0.7, 2.9, 6.0]   |
| <b>Visit 4</b>                                  | [0.7, 1.3, 3.1]  | [2.8, 4.0, 8.3]      | [0.9, 1.6, 4.0]     | [1.9, 3.3, 5.7]    | [0.4, 0.7, 4.3]   |
| <b>Participants having five visits (n=3)</b>    |                  |                      |                     |                    |                   |
| <b>Visit 1</b>                                  | [NA*, 3.0, 3.2]  | [3.0, 3.3, 4.5]      | [2.3, 3.1, 3.9]     | [2.6, 2.6, 2.6]    | [1.0, 2.4, 3.8]   |
| <b>Visit 2</b>                                  | [2.6, 2.9, 3.3]  | [NA*, 2.6, 2.7]      | [NA*, 1.9, 2.8]     | [4.1, 4.6, 5.7]    | [1.3, 1.7, 2.2]   |
| <b>Visit 3</b>                                  | [2.4, 3.6, 8.5]  | [NA*, 3.5, 3.7]      | [NA*, NA*, 4.9]     | [3.3, 4.6, 5.8]    | [5.2, 5.2, 5.2]   |
| <b>Visit 4</b>                                  | [NA*, NA*, 2.2]  | [2.5, 4.2, 7.1]      | [NA*, NA*, 2.9]     | [2.6, 2.9, 3.2]    | [0.7, 1.4, 2.9]   |
| <b>Visit 5</b>                                  | [0.7, 1.6, 34.6] | [3.2, 5.2, 6.0]      | [1.4, 2.1, 3.5]     | [2.6, 2.7, 2.8]    | [0.3, 0.6, 0.9]   |

\*NA=missing data

**eAppendix 6b:** Gene-specific, *LINE-1*, and *Alu* DNA methylation (% 5mC) across visits [5<sup>th</sup>, 50<sup>th</sup>, and 95<sup>th</sup> percentiles]

| Gene or elements                                | <i>IFN-γ</i>       | <i>IL-6</i>        | <i>iNOS</i>        | <i>GCR</i>         | <i>LINE-1</i>      | <i>Alu</i>         |
|-------------------------------------------------|--------------------|--------------------|--------------------|--------------------|--------------------|--------------------|
| <b>n</b> observations                           | 1,736              | 1,749              | 1,273              | 1,549              | 1,761              | 1,779              |
| <b>n</b> missing                                | 62                 | 49                 | 525                | 249                | 37                 | 19                 |
| <b>Baseline (n=777)</b>                         | [75.4, 85.2, 91.1] | [25.4, 43.7, 62.1] | [57.6, 70.6, 79.8] | [37.6, 47.0, 55.8] | [74.0, 77.3, 82.8] | [24.5, 26.1, 28.1] |
| <b>Participants having one visit (n=221)</b>    |                    |                    |                    |                    |                    |                    |
| <b>Visit 1</b>                                  | [72.4, 85.2, 91.8] | [23.7, 43.8, 61.6] | [55.4, 70.3, 80.9] | [37.3, 46.3, 54.8] | [74.0, 77.1, 83.6] | [24.6, 26.0, 27.9] |
| <b>Participants having two visits (n=217)</b>   |                    |                    |                    |                    |                    |                    |
| <b>Visit 1</b>                                  | [75.4, 85.5, 90.9] | [23.7, 43.1, 65.3] | [60.9, 71.0, 80.0] | [39.7, 47.0, 57.6] | [74.1, 77.3, 83.0] | [24.2, 26.0, 28.5] |
| <b>Visit 2</b>                                  | [75.8, 86.2, 91.4] | [24.7, 42.8, 59.8] | [54.1, 68.2, 78.2] | [33.4, 47.0, 55.0] | [75.1, 81.0, 84.7] | [23.3, 25.9, 28.8] |
| <b>Participants having three visits (n=216)</b> |                    |                    |                    |                    |                    |                    |
| <b>Visit 1</b>                                  | [75.8, 84.7, 91.1] | [28.9, 43.7, 59.8] | [59.4, 70.4, 78.6] | [37.3, 46.8, 54.5] | [73.7, 77.4, 82.7] | [24.6, 26.1, 28.2] |
| <b>Visit 2</b>                                  | [76.4, 86.8, 90.7] | [28.4, 43.0, 57.5] | [56.8, 68.9, 78.5] | [37.3, 47.5, 54.7] | [75.4, 79.1, 83.9] | [24.1, 25.6, 27.4] |
| <b>Visit 3</b>                                  | [76.3, 86.2, 91.1] | [24.9, 42.9, 59.7] | [56.8, 68.9, 78.5] | [34.3, 46.4, 54.6] | [76.0, 82.6, 85.4] | [22.9, 26.2, 29.7] |
| <b>Participants having four visits (n=120)</b>  |                    |                    |                    |                    |                    |                    |
| <b>Visit 1</b>                                  | [76.9, 84.4, 90.7] | [28.9, 43.8, 61.8] | [59.9, 71.6, 79.1] | [38.9, 47.4, 60.6] | [74.2, 77.3, 81.7] | [24.6, 26.2, 28.4] |
| <b>Visit 2</b>                                  | [76.9, 85.6, 91.4] | [25.3, 43.4, 58.4] | [58.7, 70.5, 77.9] | [36.9, 48.2, 56.9] | [74.7, 78.9, 84.3] | [24.7, 25.9, 27.9] |
| <b>Visit 3</b>                                  | [75.0, 86.4, 89.3] | [28.7, 44.4, 62.9] | [57.6, 70.5, 77.9] | [41.4, 48.3, 54.1] | [74.8, 79.0, 83.7] | [22.6, 25.6, 27.6] |
| <b>Visit 4</b>                                  | [77.5, 86.2, 92.7] | [26.3, 44.9, 60.5] | [55.3, 65.2, 78.5] | [37.4, 48.0, 56.9] | [81.8, 83.9, 86.0] | [25.6, 27.6, 30.5] |
| <b>Participants having five visits (n=3)</b>    |                    |                    |                    |                    |                    |                    |
| <b>Visit 1</b>                                  | [82.0, 85.6, 93.9] | [NA*, 44.2, 51.8]  | [69.6, 70.5, 71.4] | [31.3, 38.1, 45.0] | [78.9, 79.4, 82.4] | [23.7, 24.8, 27.5] |
| <b>Visit 2</b>                                  | [84.2, 86.2, 89.9] | [36.8, 44.8, 50.1] | [64.1, 66.5, 69.0] | [40.9, 43.7, 46.5] | [81.1, 81.7, 82.3] | [25.8, 25.9, 27.7] |
| <b>Visit 3</b>                                  | [83.9, 85.0, 86.2] | [39.0, 42.8, 50.1] | [71.9, 74.0, 76.2] | [42.9, 45.9, 49.0] | [78.0, 78.9, 80.0] | [26.3, 26.5, 27.1] |
| <b>Visit 4</b>                                  | [87.7, 89.2, 89.7] | [13.8, 30.4, 47.9] | [45.9, 56.8, 67.8] | [15.7, 42.5, 44.8] | [75.0, 78.1, 78.5] | [20.4, 26.4, 26.8] |
| <b>Visit 5</b>                                  | [80.1, 86.8, 92.1] | [17.0, 28.6, 44.3] | [62.3, 66.4, 70.5] | [24.1, 45.4, 50.6] | [82.7, 83.3, 84.9] | [27.0, 27.5, 30.4] |

**eAppendix 7:** Associations between a 5°C increase in temperature and gene-specific methylation across the 1<sup>st</sup>, 2<sup>nd</sup>, and 3<sup>rd</sup> weeks of exposure (Estimates and associated 95% CI)

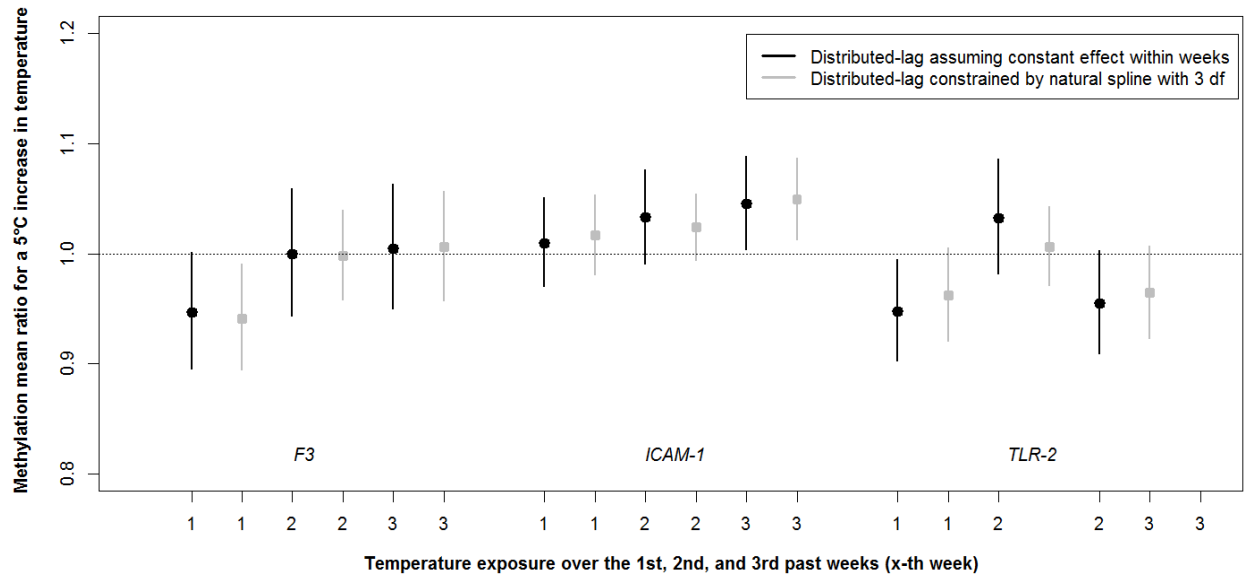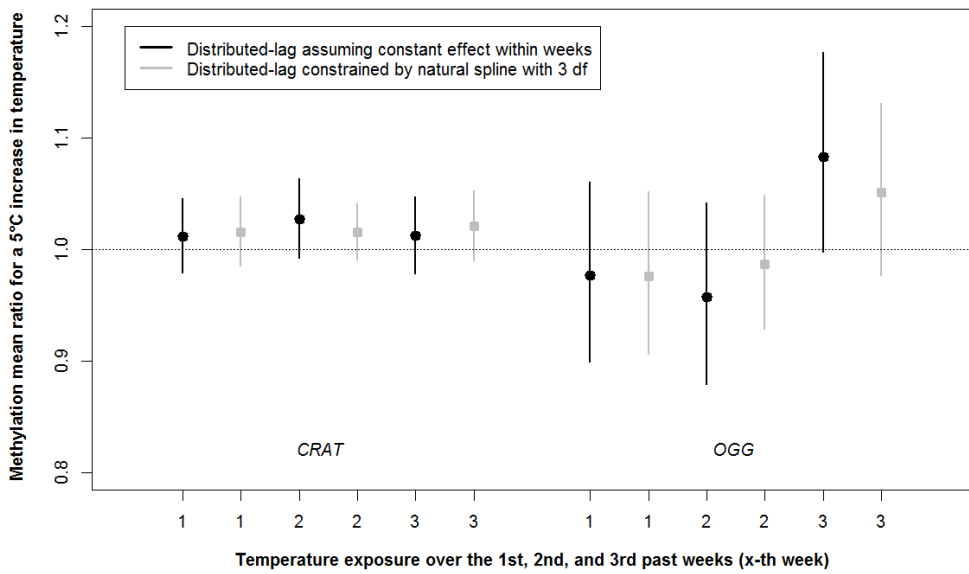



Change in methylation (%.5mC) for a 5°C increase in temperature

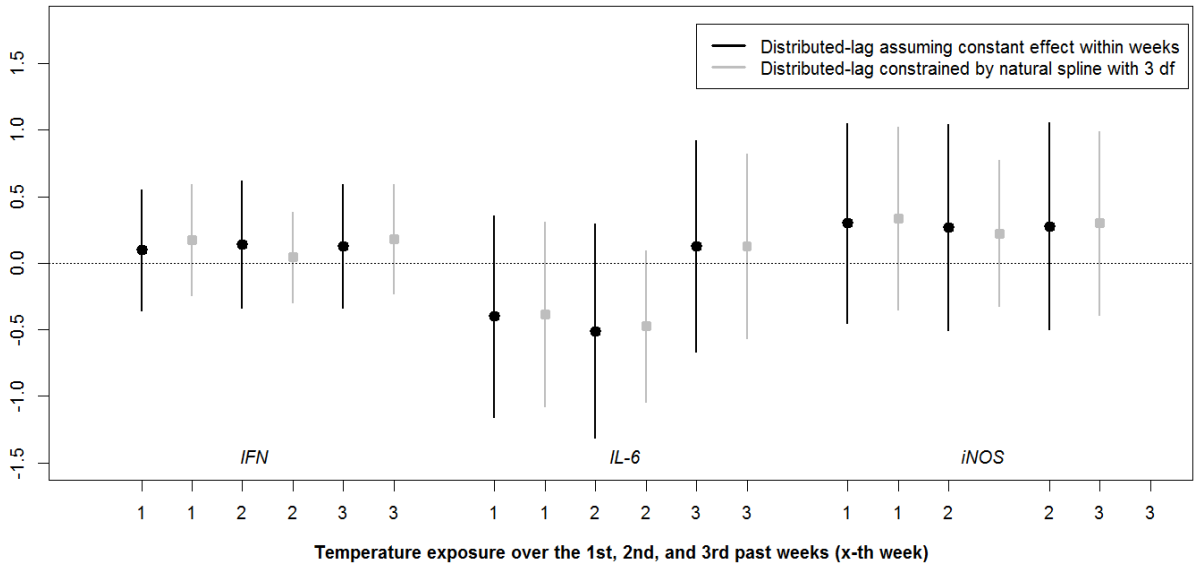

Change in methylation (%.5mC) for a 5°C increase in temperature

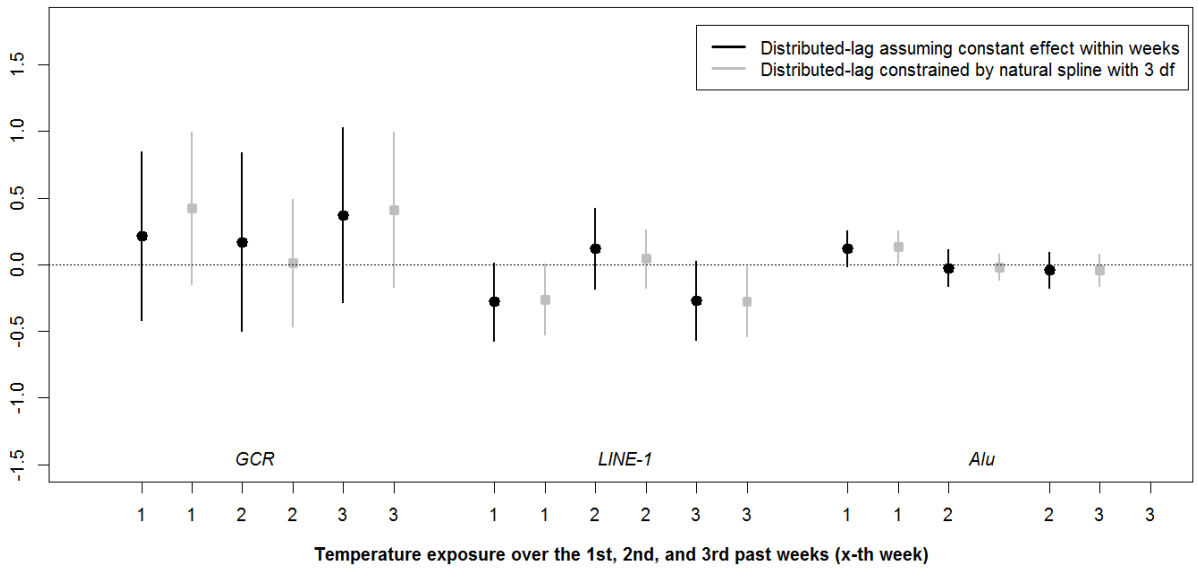

**eAppendix 8:** Associations between a 10% increase in relative humidity and methylation on specific genes, *LINE-1*, and *Alu* across the 1<sup>st</sup>, 2<sup>nd</sup>, and 3<sup>rd</sup> weeks of exposure (Estimates and associated 95% CI)

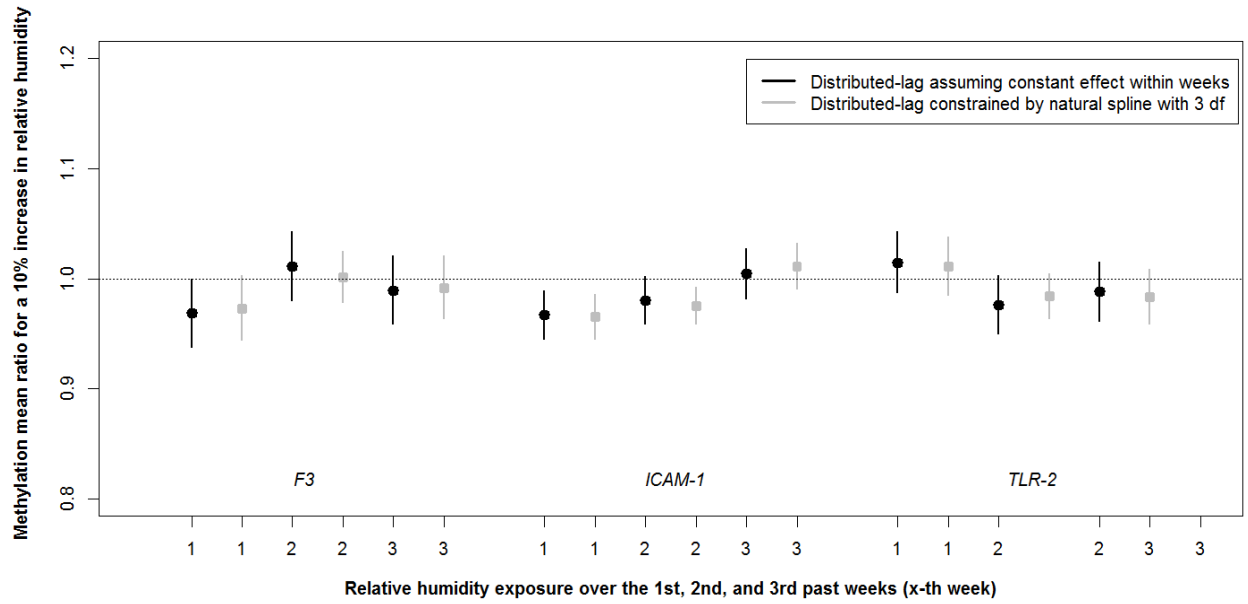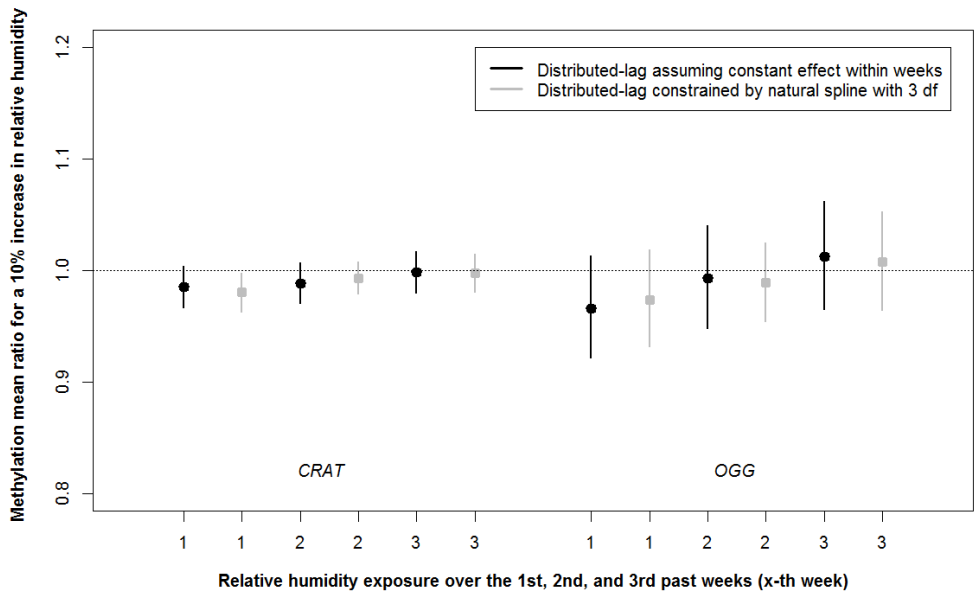

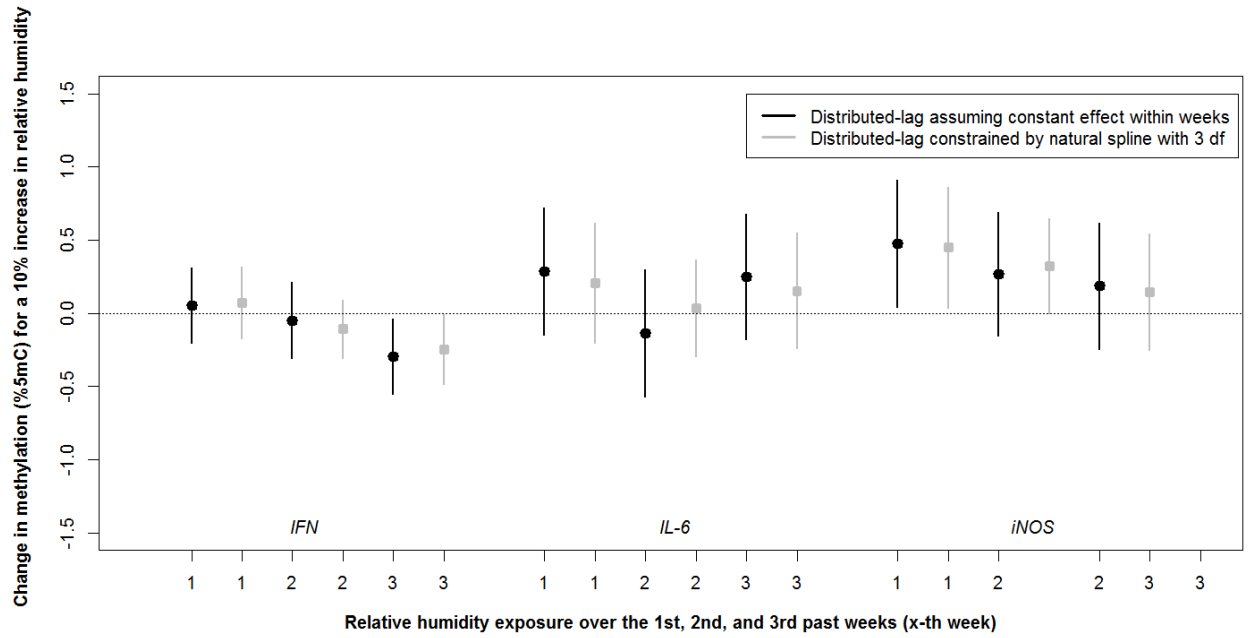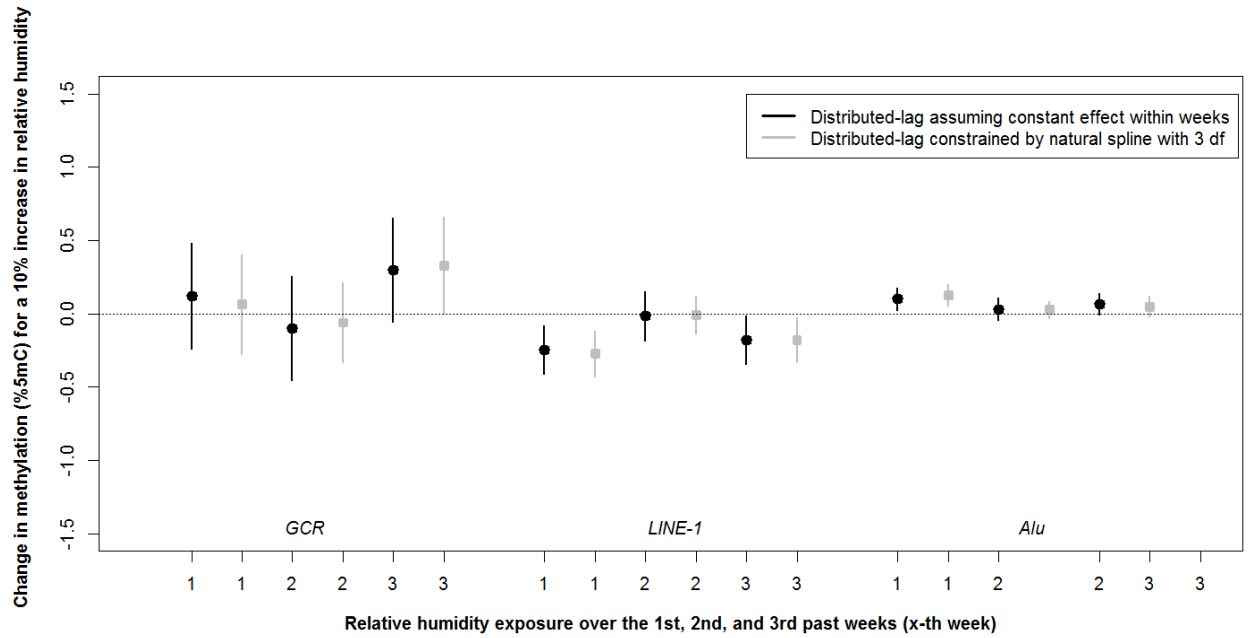

**eAppendix 9a:** Associations between temperature and relative humidity exposure (over the 3-week period preceding medical examination) and gene-specific methylation (sensitivity analysis)

**Methylation mean ratio for a  $\Delta$  increase in temperature and relative humidity [95% CI]**

| <i>F3</i>         | Model 1<br>(Main model)       | Model 2                       | Model 3                       |
|-------------------|-------------------------------|-------------------------------|-------------------------------|
| Temperature       | 0.945 [0.874 to 1.021]        | 0.951 [0.879 to 1.029]        | 0.970 [0.890 to 1.058]        |
| Relative humidity | 0.967 [0.921 to 1.015]        | 0.970 [0.923 to 1.019]        | 0.967 [0.920 to 1.016]        |
| <i>ICAM-1</i>     | Model 1<br>(Main model)       | Model 2                       | Model 3                       |
| Temperature       | <b>1.092 [1.034 to 1.154]</b> | <b>1.090 [1.031 to 1.152]</b> | <b>1.115 [1.050 to 1.185]</b> |
| Relative humidity | <b>0.952 [0.920 to 0.985]</b> | <b>0.951 [0.918 to 0.984]</b> | <b>0.949 [0.917 to 0.983]</b> |
| <i>TLR-2</i>      | Model 1<br>(Main model)       | Model 2                       | Model 3                       |
| Temperature       | <b>0.933 [0.872 to 0.999]</b> | <b>0.930 [0.868 to 0.996]</b> | 0.929 [0.862 to 1.001]        |
| Relative humidity | 0.978 [0.938 to 1.020]        | 0.978 [0.937 to 1.020]        | 0.974 [0.933 to 1.017]        |
| <i>CRAT</i>       | Model 1<br>(Main model)       | Model 2                       | Model 3                       |
| Temperature       | <b>1.053 [1.004 to 1.104]</b> | <b>1.062 [1.012 to 1.114]</b> | <b>1.095 [1.040 to 1.153]</b> |
| Relative humidity | 0.966 [0.920 to 1.014]        | 0.977 [0.949 to 1.006]        | 0.977 [0.949 to 1.006]        |
| <i>OGG</i>        | Model 1<br>(Main model)       | Model 2                       | Model 3                       |
| Temperature       | 1.013 [0.904 to 1.134]        | 1.038 [0.925 to 1.164]        | 0.989 [0.872 to 1.122]        |
| Relative humidity | 0.971 [0.903 to 1.043]        | 0.971 [0.903 to 1.044]        | 0.967 [0.898 to 1.042]        |

$\Delta^*$  corresponds to increments of 5°C and 10% for temperature and relative humidity, respectively

a) Variables included in model 1:  $f_1$ (temperature)<sup>d</sup>,  $f_2$ (relative humidity)<sup>d</sup>, age, body mass index, smoking status, diabetes status, statin use, % neutrophils in blood count, % lymphocytes in blood count, % monocytes in blood count, % basophils in blood count, seasonal sine and cosine, season, and batch

b) Variables included in model 2: variables included in model 1 and  $f_3$ (barometric pressure)<sup>d</sup>

c) Variables included in model 3: variables included in model 1 and  $f_3$ (PM<sub>2.5</sub>)<sup>d</sup>

d)  $f_1$ (temperature),  $f_2$ (relative humidity),  $f_3$ (barometric pressure) represent the distributed-lag functions with sets of coefficients constrained by a natural spline (with 3 degrees of freedom) that correspond to the temperature and relative humidity effects at lags 0 and 20 days.

**eAppendix 9b:** Associations between temperature and relative humidity exposure (over the 3-week period preceding medical examination) and gene-specific, *LINE-1*, and *Alu* methylation (sensitivity analysis)

**Change in methylation (% 5mC) for a  $\Delta$  increase in temperature and relative humidity [95% CI]**

| <i>IFN-<math>\gamma</math></i> | Model 1<br>(Main model)          | Model 2                          | Model 3                          |
|--------------------------------|----------------------------------|----------------------------------|----------------------------------|
| Temperature                    | 0.396 [-0.256 to 1.048]          | 0.352 [-0.311 to 1.016]          | 0.479 [-0.244 to 1.202]          |
| Relative humidity              | -0.289 [-0.684 to 0.106]         | -0.246 [-0.649 to 0.156]         | -0.284 [-0.691 to 0.124]         |
| <i>IL-6</i>                    | Model 1<br>(Main model)          | Model 2                          | Model 3                          |
| Temperature                    | -0.736 [-1.810 to 0.338]         | -0.865 [-1.955 to 0.224]         | -1.044 [-2.237 to 0.149]         |
| Relative humidity              | 0.390 [-0.264 to 1.043]          | 0.264 [-0.401 to 0.930]          | 0.367 [-0.317 to 1.050]          |
| <i>iNOS</i>                    | Model 1<br>(Main model)          | Model 2                          | Model 3                          |
| Temperature                    | 0.863 [-0.174 to 1.900]          | 0.936 [-0.122 to 1.994]          | <b>1.681 [0.530 to 2.831]</b>    |
| Relative humidity              | <b>0.913 [0.253 to 1.572]</b>    | <b>0.911 [0.237 to 1.585]</b>    | <b>0.997 [0.316 to 1.677]</b>    |
| <i>GCR</i>                     | Model 1<br>(Main model)          | Model 2                          | Model 3                          |
| Temperature                    | 0.845 [-0.053 to 1.743]          | 0.806 [-0.106 to 1.718]          | <b>1.192 [0.199 to 2.186]</b>    |
| Relative humidity              | 0.328 [-0.222 to 0.877]          | 0.305 [-0.255 to 0.865]          | 0.373 [-0.193 to 0.938]          |
| <i>LINE-1</i>                  | Model 1<br>(Main model)          | Model 2                          | Model 3                          |
| Temperature                    | <b>-0.497 [-0.915 to -0.080]</b> | <b>-0.503 [-0.927 to -0.079]</b> | -0.109 [-0.567 to 0.349]         |
| Relative humidity              | <b>-0.464 [-0.719 to -0.210]</b> | <b>-0.473 [-0.731 to -0.214]</b> | <b>-0.451 [-0.710 to -0.192]</b> |
| <i>Alu</i>                     | Model 1<br>(Main model)          | Model 2                          | Model 3                          |
| Temperature                    | 0.074 [-0.114 to 0.262]          | 0.065 [-0.125 to 0.256]          | -0.039 [-0.248 to 0.170]         |
| Relative humidity              | <b>0.199 [0.083 to 0.314]</b>    | <b>0.177 [0.060 to 0.294]</b>    | <b>0.167 [0.049 to 0.286]</b>    |

$\Delta^*$  corresponds to increments of 5°C and 10% for temperature and relative humidity, respectively

a) Variables included in model 1:  $f_1$ (temperature)<sup>d</sup>,  $f_2$ (relative humidity)<sup>d</sup>, age, body mass index, smoking status, diabetes status, statin use, % neutrophils in blood count, % lymphocytes in blood count, % monocytes in blood count, % basophils in blood count, seasonal sine and cosine, season, and batch

b) Variables included in model 2: variables included in model 1 and  $f_3$ (barometric pressure)<sup>d</sup>

c) Variables included in model 3: variables included in model 1 and  $f_3$ (PM<sub>2.5</sub>)<sup>d</sup>

d)  $f_1$ (temperature),  $f_2$ (relative humidity),  $f_3$ (barometric pressure) represent the distributed-lag functions with sets of coefficients constrained by a natural spline (with 3 degrees of freedom) that correspond to the temperature and relative humidity effects at lags 0 and 20 days.
